# Supplementary material
Source: HighWire-hosted journal article supplement (https://www.cmaj.ca/highwire/filestream/147362/field_highwire_adjunct_files/3/220914-res-4-at.pdf)
Supplement: 220914-res-4-at.pdf [file 220914-res-4-at.pdf]

Supplementary Figure 4) Nomograms for both models

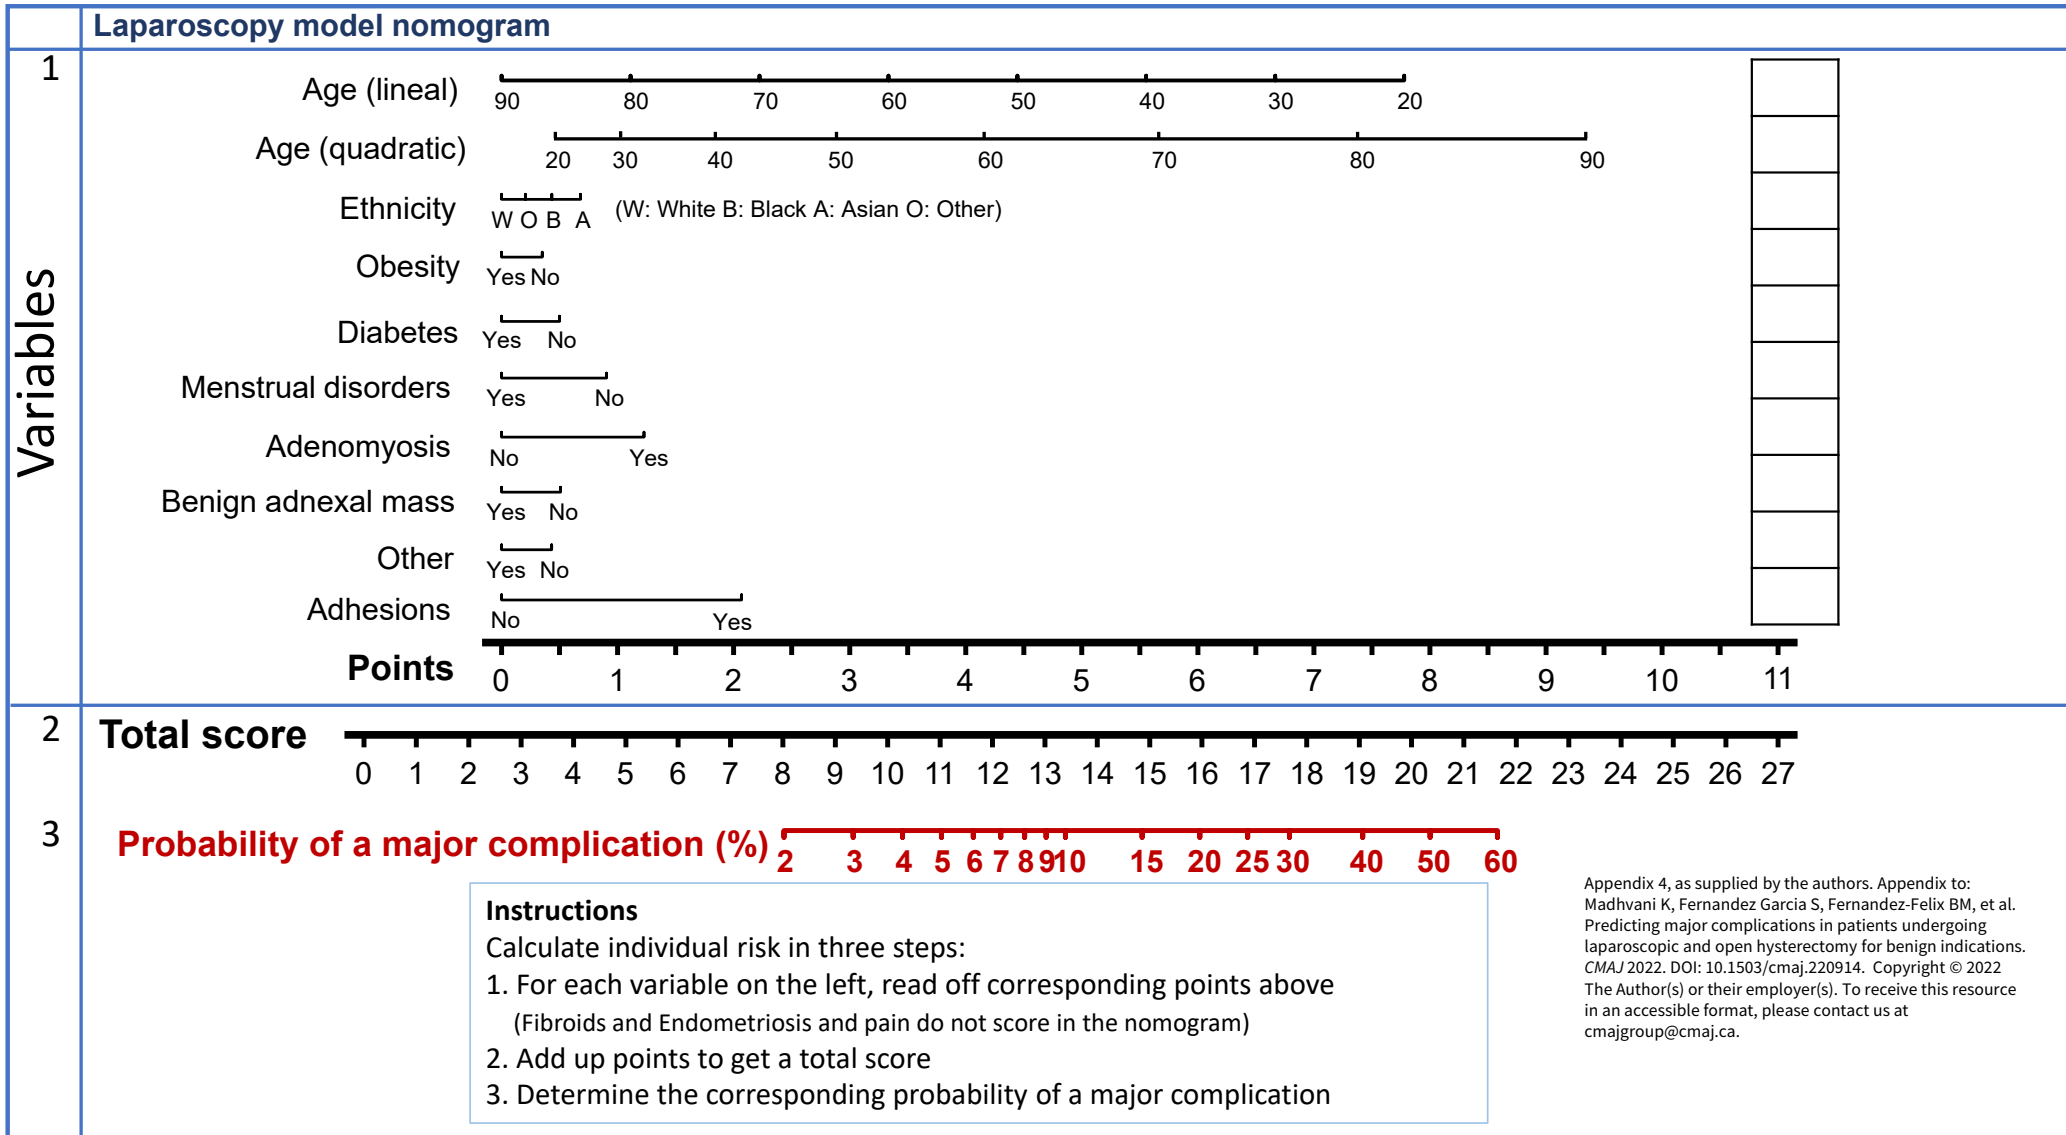

### Abdominal model nomogram

Variables

Points

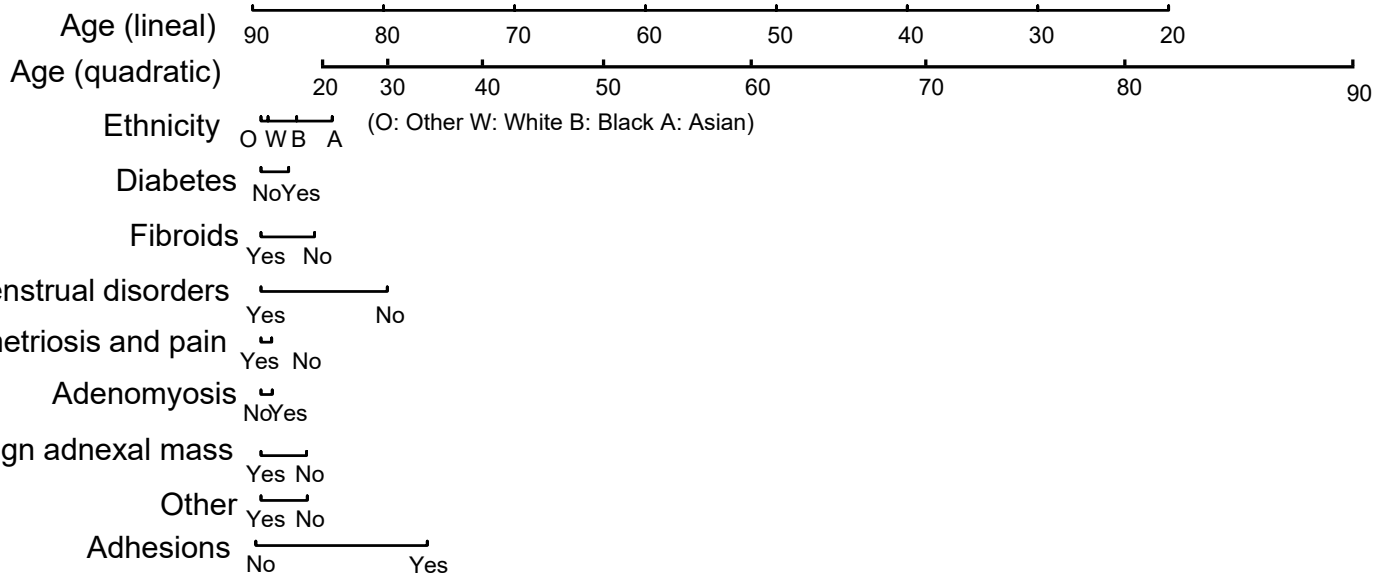

|  |
|--|
|  |
|  |
|  |
|  |
|  |
|  |
|  |
|  |
|  |
|  |

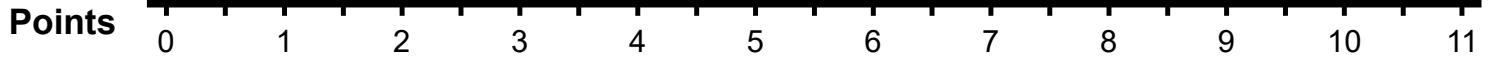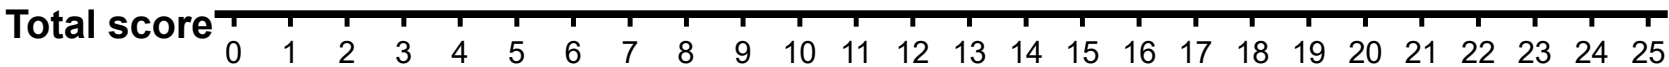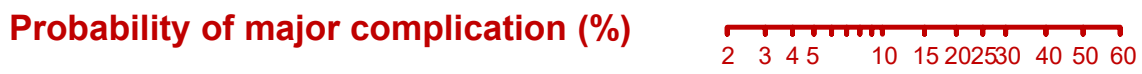

**Instructions**  
 Calculate individual risk in three steps:  
 1. For each variable on the left, read off corresponding points above  
 (Obesity does not score in the nomogram)  
 2. Add up points to get a total score  
 3. Determine the corresponding probability of a major complication
